# Supplementary material for: Epigenetic reactivation of tumor suppressor genes with CRISPRa technologies as precision therapy for hepatocellular carcinoma
Source: PubMed Central journal article supplement (PMC10149030; doi:10.1186/s13148-023-01482-0), 2023-04-29

Supplementary Figure S3

A

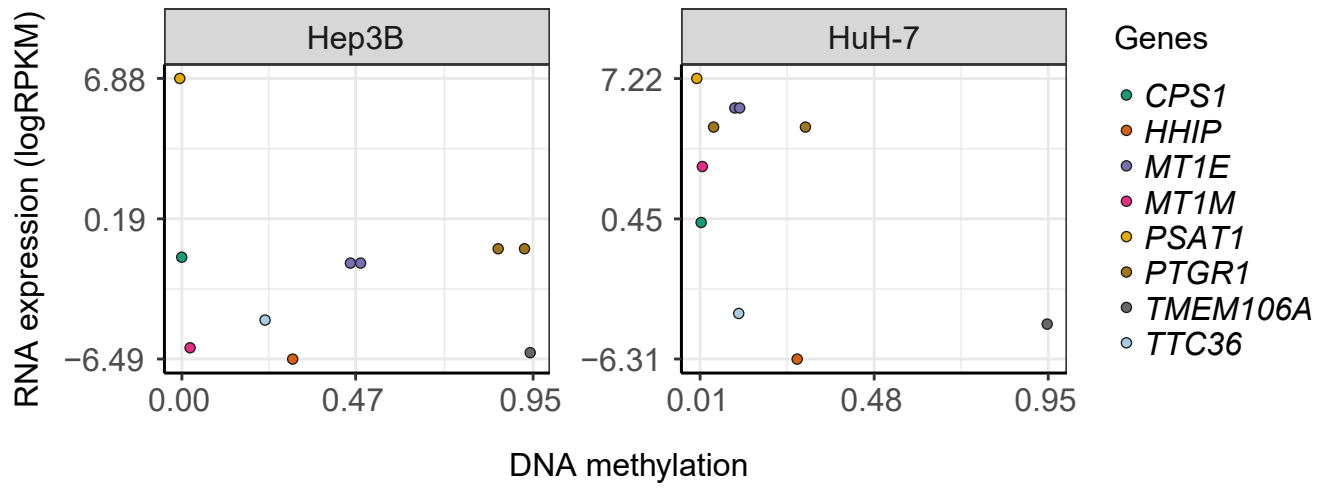

Supplement: 13148_2023_1482_MOESM3_ESM.pdf [file 13148_2023_1482_MOESM3_ESM.pdf]
