# Supplementary material for: Epigenetic reactivation of tumor suppressor genes with CRISPRa technologies as precision therapy for hepatocellular carcinoma
Source: PubMed Central journal article supplement (PMC10149030; doi:10.1186/s13148-023-01482-0), 2023-04-29

# Supplementary Figure S8

## Hep3B

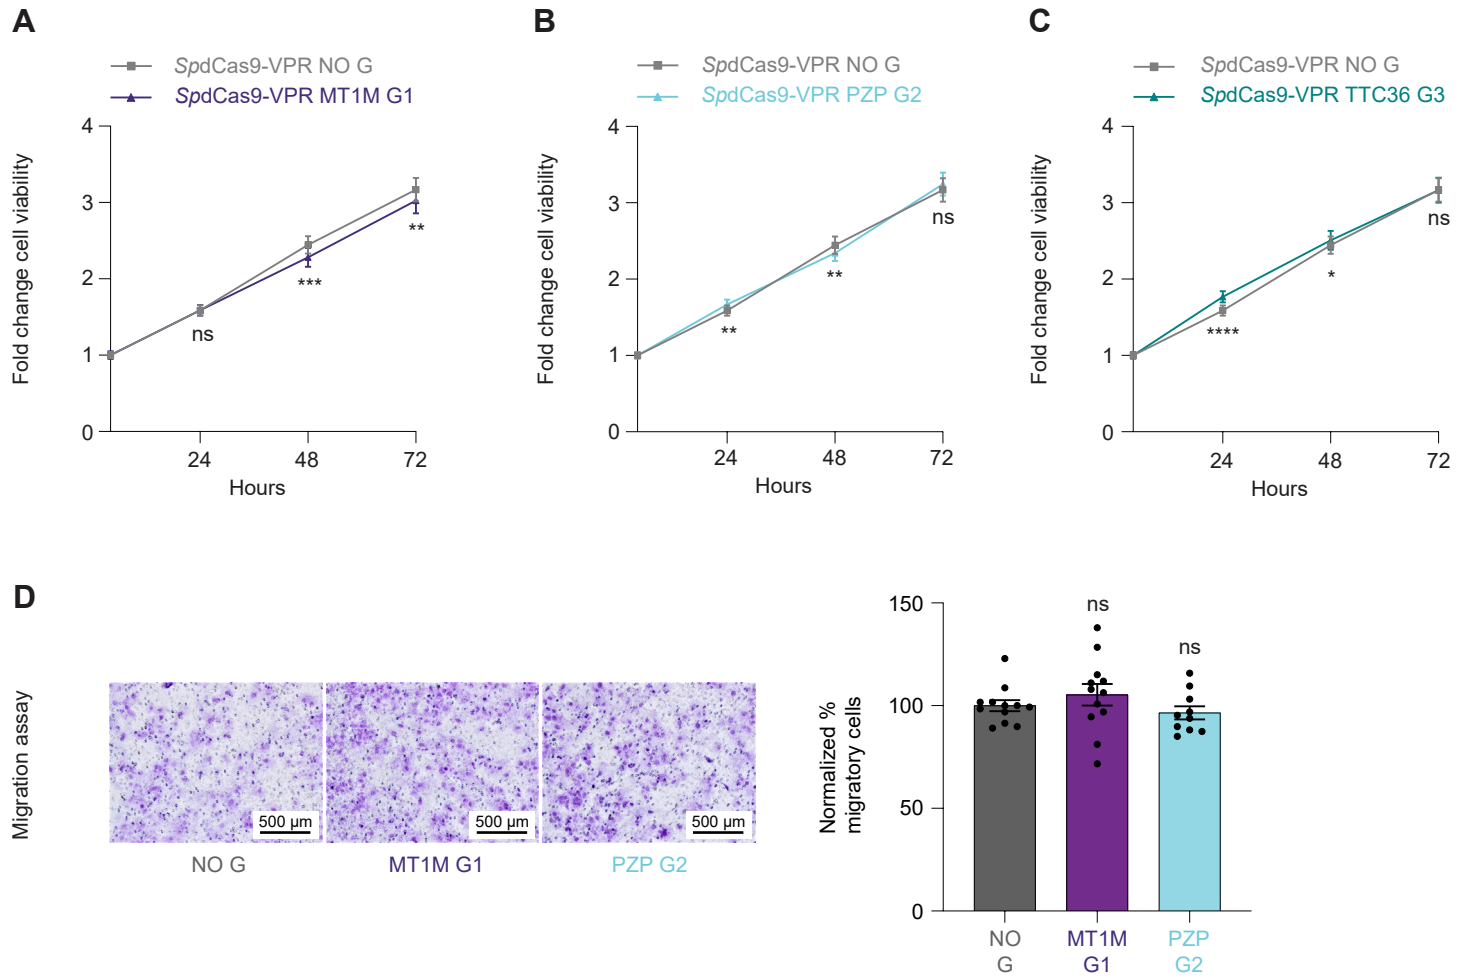

Supplement: 13148_2023_1482_MOESM9_ESM.pdf [file 13148_2023_1482_MOESM9_ESM.pdf]
