# Supplementary material for: Epigenetic reactivation of tumor suppressor genes with CRISPRa technologies as precision therapy for hepatocellular carcinoma
Source: PubMed Central journal article supplement (PMC10149030; doi:10.1186/s13148-023-01482-0), 2023-04-29
Supplement: 13148_2023_1482_MOESM10_ESM.pdf [file 13148_2023_1482_MOESM10_ESM.pdf]

### Supplementary Table S1. gRNAs designed for gene reactivation by CRISPRa technology.

The genomic annotations for each designed gRNA are from the Genome Reference Consortium Human Build 38 (GRCh38/hg38). The distance from the TSS is expressed in base pairs. PAM protospacer-adjacent motif, Chr chromosome, - negative or antisense DNA strand, + positive or sense DNA strand, TSS transcription start site.

| Target gene       | gRNA name | gRNA sequence        | PAM sequence | DNA strand targeted | Distance from the TSS | Genomic annotation (start) | Genomic annotation (end) |
|-------------------|-----------|----------------------|--------------|---------------------|-----------------------|----------------------------|--------------------------|
| <i>CDKN2A</i>     | G1        | CTTCCGGCTGGTGCCCCCGG | GGG          | Chr9 -              | +9                    | 21975105                   | 21975124                 |
| <i>CDKN2A</i>     | G2        | CCAACCTGGGGCGACTTCAG | GGG          | Chr9 -              | +36                   | 21975078                   | 21975097                 |
| <i>CDKN2A</i>     | G3        | CGCCGTGAGCGAGTGCTCGG | AGG          | Chr9 +              | +119                  | 21975015                   | 21975034                 |
| <i>CDKN2A</i>     | G4        | CCTTGCTGGAAAGATACCG  | CGG          | Chr9 -              | +122                  | 21974992                   | 21975011                 |
| <i>CDKN2A</i>     | G5        | ATTTGAGGGACAGGGTCGGA | GGG          | Chr9 -              | +157                  | 21974957                   | 21974976                 |
| <i>CPS1</i>       | G1        | GGCCTAAGTTTGTCTTCTG  | AGG          | Chr2 +              | -69                   | 210477613                  | 210477632                |
| <i>CPS1</i>       | G2        | AAAGAGCAAACCTGGGTGTG | GGG          | Chr2 -              | +7                    | 210477669                  | 210477688                |
| <i>CPS1</i>       | G3        | AATTCATGAAGATTTAGCCG | AGG          | Chr2 +              | +56                   | 210477738                  | 210477757                |
| <i>CPS1</i>       | G4        | TCCAGCTTAAGACTACCAT  | GGG          | Chr2 -              | +102                  | 210477764                  | 210477783                |
| <i>HHIP</i>       | G1        | GCGAGAAGCGGTGACGTCAA | GGG          | Chr4 +              | +74                   | 144646070                  | 144646089                |
| <i>HHIP</i>       | G2        | TTTTAACTAGCGCGCGGGG  | AGG          | Chr4 -              | +136                  | 144646112                  | 144646131                |
| <i>HHIP</i>       | G3        | GCTGAGGTCTCCTCTGCCGG | CGG          | Chr4 -              | +209                  | 144646185                  | 144646204                |
| <i>HHIP</i>       | G4        | AGGAACAGAAACGGCGACCG | CGG          | Chr4 -              | +277                  | 144646253                  | 144646272                |
| <i>miR-122-5p</i> | G1        | TTTATCGATTCAGTGGGGGA | GGG          | Chr18 +             | +391                  | 58446160                   | 58446179                 |
| <i>miR-122-5p</i> | G2        | CTGGATCCCATAAAGGGAGA | GGG          | Chr18 +             | +437                  | 58446225                   | 58446244                 |
| <i>miR-122-5p</i> | G3        | GAGCTGACTGGGGGTAAGTG | CGG          | Chr18 +             | +537                  | 58446325                   | 58446344                 |
| <i>miR-122-5p</i> | G4        | AAGAACGGCCTGATCACTCA | GGG          | Chr18 -             | +606                  | 58446375                   | 58446394                 |
| <i>MT1E</i>       | G1        | CGAGCGAACGGGCTCCAAAG | GGG          | Chr16 +             | -97                   | 56625576                   | 56625595                 |
| <i>MT1E</i>       | G2        | GCTGCTCTATTTATAGACGG | AGG          | Chr16 -             | +93                   | 56625746                   | 56625765                 |
| <i>MT1E</i>       | G3        | AGTGAGACGAACAAGCAGTC | AGG          | Chr16 -             | +148                  | 56625801                   | 56625820                 |
| <i>MT1E</i>       | G4        | CGCAGAGCTTCCCTTACCAG | TGG          | Chr16 -             | +224                  | 56625877                   | 56625896                 |
| <i>MT1M</i>       | G1        | GCGGTGCGAACCAGCCGGG  | CGG          | Chr16 +             | -62                   | 56632560                   | 56632579                 |
| <i>MT1M</i>       | G2        | GCGGCTGCTTTTCTACTCAG | GGG          | Chr16 -             | +22                   | 56632624                   | 56632643                 |
| <i>MT1M</i>       | G3        | GCTCCACCACGCCGTCCGGG | TGG          | Chr16 +             | +32                   | 56632654                   | 56632673                 |
| <i>MT1M</i>       | G4        | AATGGGATTCCTAGGGCGCA | GGG          | Chr16 -             | +175                  | 56632777                   | 56632796                 |
| <i>PTGR1</i>      | G1        | TGAACGTGAAGCTAAGTCGT | TGG          | Chr9 +              | -529                  | 111600385                  | 111600404                |
| <i>PTGR1</i>      | G2        | GGTGTTACGAGGGCGGACTG | GGG          | Chr9 -              | -363                  | 111600199                  | 111600218                |
| <i>PTGR1</i>      | G3        | CGGTGCTGGCTCCGATCCCT | GGG          | Chr9 +              | -240                  | 111600096                  | 111600115                |
| <i>PTGR1</i>      | G4        | CGGCGGAAATATGCCCCGTG | GGG          | Chr9 +              | -137                  | 111599993                  | 111600012                |
| <i>PZP</i>        | G1        | GTTGAAGGTTTCTTATCAGG | AGG          | Chr12 -             | -268                  | 9208619                    | 9208638                  |
| <i>PZP</i>        | G2        | AAAAGGGTCATTACTCTCAG | TGG          | Chr12 +             | -126                  | 9208497                    | 9208516                  |
| <i>PZP</i>        | G3        | TGGGGCTTGTGTACATAG   | TGG          | Chr12 -             | -81                   | 9208432                    | 9208451                  |
| <i>PZP</i>        | G4        | GAGATTTATCCCTCACAATG | CGG          | Chr12 -             | +12                   | 9208339                    | 9208358                  |
| <i>TMEM106A</i>   | G1        | TCGGTAACGTTTGAAGAGC  | TGG          | Chr17 +             | -98                   | 43211729                   | 43211748                 |
| <i>TMEM106A</i>   | G2        | GCACTGAGTCAAAGCTTGAG | GGG          | Chr17 +             | +10                   | 43211837                   | 43211856                 |
| <i>TMEM106A</i>   | G3        | GAGAGTGAATCGAAAATGC  | GGG          | Chr17 -             | +66                   | 43211873                   | 43211892                 |
| <i>TMEM106A</i>   | G4        | TAGGTATAAAGGGTCTAGGG | AGG          | Chr17 -             | +126                  | 43211933                   | 43211952                 |
| <i>TTC36</i>      | G1        | ATCCAGCTTCAGCCTTAAGG | TGG          | Chr11 -             | -243                  | 118527232                  | 118527251                |
| <i>TTC36</i>      | G2        | CCAAGTAGTCTGCCAAGCCA | GGG          | Chr11 +             | -200                  | 118527295                  | 118527314                |
| <i>TTC36</i>      | G3        | GGGAGACACTCCTCACGAAG | GGG          | Chr11 +             | -131                  | 118527364                  | 118527383                |
| <i>TTC36</i>      | G4        | TTTTGGAGTTGAGCACCATG | GGG          | Chr11 +             | -17                   | 118527478                  | 118527497                |
