# Supplementary material for: Epigenetic reactivation of tumor suppressor genes with CRISPRa technologies as precision therapy for hepatocellular carcinoma
Source: PubMed Central journal article supplement (PMC10149030; doi:10.1186/s13148-023-01482-0), 2023-04-29
Supplement: 13148_2023_1482_MOESM11_ESM.pdf [file 13148_2023_1482_MOESM11_ESM.pdf]

**Supplementary Table S2. TaqMan gene expression assays utilized for qRT-PCR in this study.** For each gene, the TaqMan Assay ID and reporter dye are listed. FAM 6-Carboxyfluorescein (6-FAM), MGB minor groove binder.

| <b>Gene</b>           | <b>TaqMan Assay ID</b> | <b>Dye</b> |
|-----------------------|------------------------|------------|
| <i>BCO2</i>           | Hs00230564_m1          | FAM-MGB    |
| <i>CDKN2A</i>         | Hs00923894_m1          | FAM-MGB    |
| <i>CPS1</i>           | Hs00157048_m1          | FAM-MGB    |
| <i>HHIP</i>           | Hs01011015_m1          | FAM-MGB    |
| <i>hsa-miR-122-5p</i> | 002245                 | FAM-MGB    |
| <i>MT1E</i>           | Hs01938284_g1          | FAM-MGB    |
| <i>MT1M</i>           | Hs00828387_g1          | FAM-MGB    |
| <i>PSAT1</i>          | Hs00795278_mH          | FAM-MGB    |
| <i>PTGR1</i>          | Hs00400932_m1          | FAM-MGB    |
| <i>PZP</i>            | Hs00161140_m1          | FAM-MGB    |
| <i>TMEM106A</i>       | Hs00376739_m1          | FAM-MGB    |
| <i>TTC36</i>          | Hs01377099_m1          | FAM-MGB    |
| <i>GAPDH</i>          | Hs99999905_m1          | FAM-MGB    |
| <i>GUSB</i>           | Hs00939627_m1          | FAM-MGB    |
| <i>PPIA</i>           | Hs04194521_s1          | FAM-MGB    |
| <i>RNU6B</i>          | 001093                 | FAM-MGB    |
| <i>ABCC3</i>          | Hs00978452_m1          | FAM-MGB    |
| <i>HRH1</i>           | Hs00911670_s1          | FAM-MGB    |
| <i>MMP11</i>          | Hs00968295_m1          | FAM-MGB    |
| <i>MOCOS</i>          | Hs00215742_m1          | FAM-MGB    |
| <i>NACC2</i>          | Hs00299236_m1          | FAM-MGB    |
| <i>NKAIN3</i>         | Hs00543621_m1          | FAM-MGB    |
| <i>NONO</i>           | Hs00939763_g1          | FAM-MGB    |
| <i>PIR</i>            | Hs01125822_m1          | FAM-MGB    |
| <i>PPA1</i>           | Hs00535680_g1          | FAM-MGB    |
| <i>RBM39</i>          | Hs00863502_g1          | FAM-MGB    |
| <i>SEMA5A</i>         | Hs01549381_m1          | FAM-MGB    |
| <i>TMEM14C</i>        | Hs00977207_g1          | FAM-MGB    |
